# Supplementary material for: Active inference as a unified model of collision avoidance behavior in human drivers
Source: Research Square preprint supplement (doi:10.21203/rs.3.rs-6804690/v1), 2025-08-19
Supplement: Supplementary file 2 [file 53062d8e44f7524fb13b2709.pdf]

# Active inference as a unified model of collision avoidance behavior in human drivers: Description of supplementary files

Julian F. Schumann, Johan Engström, Leif Johnson, Matthew O’Kelly,  
Jens Kober, Arkady Zgonnikov

The following video files are attached as additional supplementary materials:

- **Simulation\_file\_3A.mp4:** A visualization of the simulation shown in Figure 3A in the main article. In this Front-to-Rear scenario, the model decides to break in response to the leading vehicle stopping.
- **Simulation\_file\_3B.mp4:** A visualization of the simulation shown in Figure 3B in the main article. In this Front-to-Rear scenario, the model decides to steer around the leading vehicle when it stops.
- **Simulation\_file\_4A.mp4:** A visualization of the simulation shown in Figure 4A in the main article. In this lateral incursion scenario (steep), the model decides to avoid the oncoming vehicle by steering to the left.
- **Simulation\_file\_4B.mp4:** A visualization of the simulation shown in Figure 4B in the main article. In this lateral incursion scenario (medium), the model is unable to avoid a collision.
- **Simulation\_file\_no\_EA.mp4:** An exemplary simulation of our model without evidence accumulation in the lateral incursion scenario (shallow), where the model is unable to prevent a collision. This simulation is referenced in the main article in the section *Results/Evaluating individual model mechanisms/Evidence accumulation*.
